# Supplementary material for: Glutathione S-Transferases Interact with AMP-Activated Protein Kinase: Evidence for S-Glutathionylation and Activation In Vitro
Source: PubMed Central journal article supplement (PMC3669356; doi:10.1371/journal.pone.0062497), 2013-05-31
Supplement: pone.0062497.s001.pdf [file pone.0062497.s001.pdf]

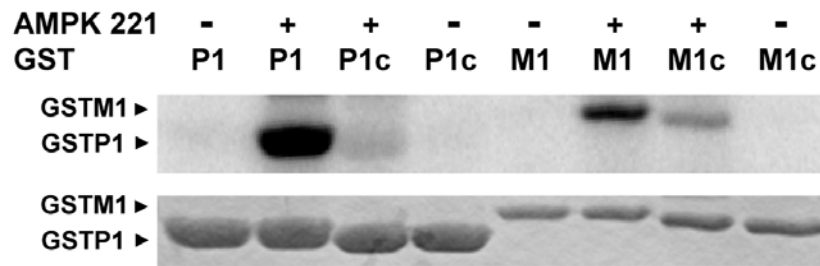

**Figure S1. The Strep-tag in Strep-GST constructs is phosphorylated by AMPK.** Phosphorylation of GSTP1(200 pmol) and GSTM1 (40 pmol) in Strep-tagged (P1,M1) and Strep-tag-free forms (P1c, M1c) by AMPK221 (4 pmol) activated by CamKK $\beta$  (1 pmol). *In vitro* phosphorylation for 10 min at 37°C was analyzed by SDS-PAGE and Typhoon phosphoimager (top panel) and control Coomassie stain for protein loading (bottom panel). Control lanes lack AMPK221 but contain CamKK $\beta$ .
