# Supplementary material for: Glutathione S-Transferases Interact with AMP-Activated Protein Kinase: Evidence for S-Glutathionylation and Activation In Vitro
Source: PubMed Central journal article supplement (PMC3669356; doi:10.1371/journal.pone.0062497), 2013-05-31
Supplement: pone.0062497.s002.pdf [file pone.0062497.s002.pdf]

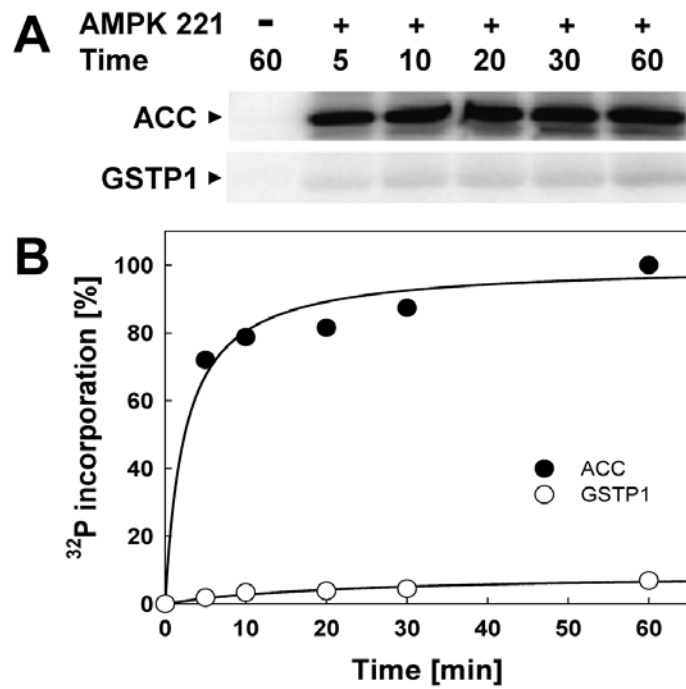

**Figure S2. Substoichiometric phosphorylation of GSTP1 by AMPK *in vitro*.** (A) Phosphorylation time course of GSTP1 or ACC (200 pmol each) by AMPK221 (4 pmol) activated by CamKK $\beta$  (1 pmol). *In vitro* phosphorylation for 5 to 60 min at 37°C was analyzed by SDS-PAGE and Typhoon phosphoimager. Control lanes lack AMPK221 but contain CamKK $\beta$ . (B) Quantification of (A) using Image Quant TL, using normalization to maximal ACC phosphorylation and fitting to phosphorylation enzyme kinetics.
