# Supplementary material for: Glutathione S-Transferases Interact with AMP-Activated Protein Kinase: Evidence for S-Glutathionylation and Activation In Vitro
Source: PubMed Central journal article supplement (PMC3669356; doi:10.1371/journal.pone.0062497), 2013-05-31
Supplement: pone.0062497.s003.pdf [file pone.0062497.s003.pdf]

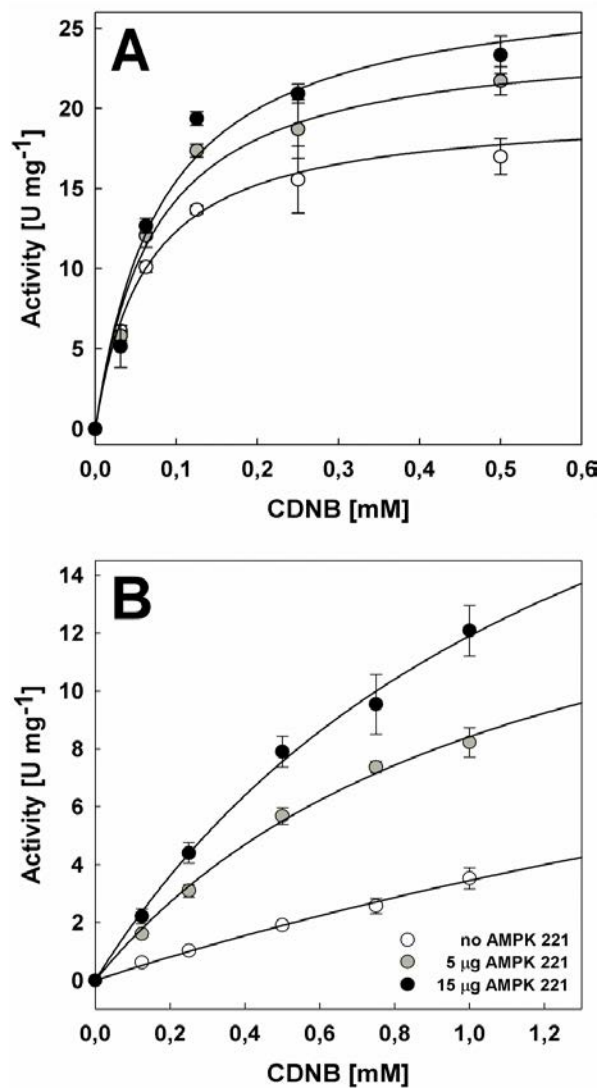

**Figure S3. GSTM1 and -P1 are activated in complexes with AMPK *in vitro*.** Enzyme activity of or 20 μg GSTM1 (A) or 30 μg GSTP1 (B) in absence or presence of 5 or 15 μg AMPK221WT at different concentrations of the model substrate CDNB and saturating glutathione concentrations.
