# Supplementary material for: Glutathione S-Transferases Interact with AMP-Activated Protein Kinase: Evidence for S-Glutathionylation and Activation In Vitro
Source: PubMed Central journal article supplement (PMC3669356; doi:10.1371/journal.pone.0062497), 2013-05-31
Supplement: pone.0062497.s004.pdf [file pone.0062497.s004.pdf]

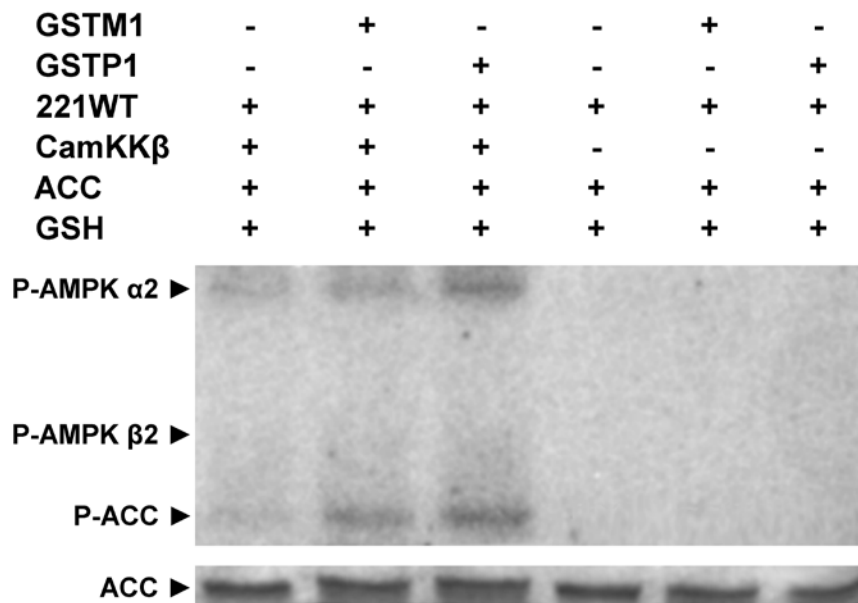

**Figure S4. Increased phosphorylation of AMPK downstream substrate depends on the presence of AMPK-activating upstream kinase CamKK $\beta$ .** AMPK 221WT preactivated with CamKK $\beta$  in kinase buffer with cold ATP and glutathionylated with 0,1 mM glutathione in presence or absence of GSTM1 or -P1, both as described in Figs 6 and 7, were incubated with ACC (200 pmol) and [ $\gamma$ - $^{32}$ P]ATP. *In vitro* phosphorylation assays were analyzed by SDS-PAGE, Ponceau protein staining (lower panel) and Typhoon phosphoimager (upper panel) are shown. Note: AMPK autophosphorylation in particular of the  $\alpha$ -subunit.
